# Supplementary material
Source: Springer Nature journal article supplement (https://www.springermedizin.de/resource/supplementary/12903_2014_476_MOESM3_ESM.pdf/9516798)

Length of follow-up (months)

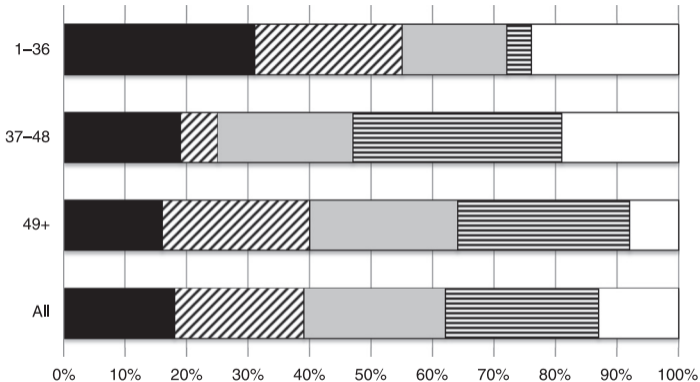

Time (months) to the first need of treatment: ■ 0-6 ▨ 7-12 ■ 13-24 ▨ 25+ □ No need

Supplement: MOESM3 [file 9516798]
